# Supplementary material
Source: publisher figshare collection journal article supplement (https://asha.figshare.com/articles/dataset/_/28299764)
Supplement: Supplementary file 1 [file 1]

## **Supplemental Material S2. DTTC Masked SCED: Semi-structured interview questions – Clinician.**

**Please note the data addressing the research questions in this study was collected from the 'general' and 'other comments' topics within the interview guide**

### **General**

*I'm going to ask you to answer some questions about your experience as a treating clinician in this study. Just a reminder that your participation is voluntary, you can skip any questions you would like and/ or discontinue the discussion at any point. I've allowed up to an hour for our conversation but we may not need that long. We will be recording this interview and will destroy the recording after we have compiled the responses from all interviews. The only potential risk is a breach of confidentiality. Let's start with your general impressions:*

- How did you find the research therapy block/s?
- What were you hoping the child/ children you treated would gain?
- What were you personally hoping to gain from participation?

### **The impact of the COVID-19 pandemic (these questions were not the focus of the current paper)**

*The last few years have been in the shadow of COVID-19. At times there have been public health orders about mask wearing, the operation of schools, and movement of the population (periods of lockdown). I'd like to ask you a few questions about your experience of providing speech therapy during the COVID-19 pandemic*

- Can you tell me a little about your experience of providing therapy during the pandemic?
  - In which ways was it different to pre-pandemic times (did you pivot to telepractice? Did you see fewer children? Did you change the frequency of your sessions? Did children go on a waiting list?)
- How did you make decisions about the service you provided (e.g. therapy with face masks, telepractice, a break, parent-delivered program)? What factors did you consider?
  - Did most families have the same service type or was there variation between families?
  - If there was variation, which factors influenced the decision? (Family preference, clinician recommendation, child attention...)
- Prior to this study, did you provide therapy using face masks?
  - If you provided therapy with face masks, what did that look like? (Who wore a mask? What type of mask? Did you use a plexiglass shield or eye shield? Was there variation based on age/ vaccination status?)
- When you discussed doing therapy using face masks with parents, what was their response? (Were they enthusiastic, reluctant...? Was there much variation across parents? What did most parents want?)
- What, if anything, were your frustrations with doing therapy during the pandemic?

### **Research sessions – face masks (these questions were not the focus of the current paper)**

*During this research trial, both you and the child wore face masks. I'd like to ask you some questions about these sessions*

- What was your first impression of needing to complete 24 sessions of DTTC wearing face masks?
- Did any parents decline the offer of participating in the research trial? Why do you think that was?
- How did *the child* respond to wearing a face mask? How did this compare to non-face mask sessions? (Did he/ she say anything to you? Was his/ her behaviour different?)
- Did *you* have any effects from wearing the face mask? (Physical effects, tiredness...)
- Did you need to do anything differently because of the face masks?
  - What did you do and how effective was it? (More frequent breaks? More encouragement of child? Use a louder voice? Find alternatives for tactile cues?)
- Do you feel that you could effectively provide DTTC when you were wearing face masks? (Could you see and hear the child clearly/ Do you feel they could see and hear you clearly?)
- What, if anything, were the benefits of doing therapy with face masks? (Compared to no therapy or therapy via telepractice)
- What, if anything, were the challenges of doing therapy with face masks?
  - How did you manage these?
  - How effective were the things you tried?
- Is there a particular type of client that you think is more suited to face masks? (Age, severity, familiarity with therapy/ SLP, temperament, attention, family support?) Why is that?
- In conditions where a face mask is to be used., which face mask set up do you feel is best? (Cloth, surgical, clear, face shield...)?
  - Does the ideal set up vary depending on the circumstances?
  - Which set up is best for which circumstances?
- When unmasked in-person therapy isn't possible for children with moderate-severe apraxia, what type of service delivery would you recommend?

Do you have any other comments?

**Demographics (may have been collected via another source)**

- Length of time working as an SLP
- Number of years working with a CAS caseload
- Proportion of caseload that has CAS
- Current practice contexts (private practice, school, university clinic, health)
