# Supplementary material
Source: publisher figshare collection journal article supplement (https://asha.figshare.com/articles/dataset/_/28299764)
Supplement: Supplementary file 3 [file 1]

## **Supplemental Material S1. DTTC Masked SCED: Semi-structured interview questions – Families.**

**Please note the data addressing the research questions in this study was collected from the 'general' and 'DTTC' topics within the interview guide**

### **General**

*"Thank you so much for your time today. I'm going to ask you to answer some questions about your family's experience in this study. Just a reminder that your participation is voluntary, you can skip any question you would like, and / or discontinue to conversation at any point. I've allowed up to an hour for our conversation, but we may not that long. The only risk is breach of confidentiality. We will be recording this interview and will destroy the recording after we have compiled the responses from all interviews. Do you have any questions before we begin?"*

- Let's start with your general impressions: How did you find the therapy block?
- What were you hoping your child would get from the treatment research?
- How did your child feel about the therapy sessions? Was he/ she happy to attend, frustrated/ reluctant? Why do you think that might have been?
- What did your child like the most?
- What, if anything, did they like the least?

### **The impact of the COVID-19 pandemic (these questions are not the focus of the current paper)**

*The last few years have been in the shadow of COVID-19. At times there have been public health orders about mask wearing, the operation of schools, and movement of the population (periods of lockdown). I'd like to ask you a few questions about your experience of engaging with speech therapy during the COVID-19 pandemic*

- Can you tell me a little about your child's experience with speech therapy during the COVID-19 pandemic?
- Was it different to pre-pandemic times?
  - In which ways was it different? (Were you able to have therapy at the same frequency? Were you able to have therapy via the same mode (in-person vs telepractice)? Were there delays in accessing assessments and/ or therapy sessions? Could your child see the same therapist?)
- Given everything else that was going on, was your child's speech a priority for you and your family? (How did you balance your concerns for your child's speech, their health and safety, and your family's other needs during the pandemic?)
- Prior to this study, did your child or their SLP wear a face mask during speech therapy sessions? How did that work for you and your child?
- What, if anything, were your frustrations with your regular (non-research) therapy?

### **Research trial sessions with face masks (these questions are note the focus of the current paper)**

*During this research trial, both the SLP and your child wore face masks. I'd like to ask you some questions about these sessions*

- Can you tell me a little about how your child reacted to wearing the face mask? (Did he/ she say anything to you? Was his/ her behaviour different on the days of therapy sessions?)
- From your observations, how similar was therapy with face masks to therapy without face masks? (Do you have any concerns about speech therapy using face masks? If so, what are your concerns?)

- Do you think the type of face mask worn in speech therapy (cloth, surgical etc) makes a difference for your child? In which way/s?
- Did your child have any effects from wearing the face mask? (Physical effects, attention affects...)
- How long was your child comfortable to wear a face mask? How could you tell they were getting uncomfortable?
- If you had a choice of in-person therapy with face masks or teletherapy, what would you choose?

### **DTTC**

*I'd now like to ask you some questions about the actual treatment used in the sessions. The treatment was called Dynamic Temporal and Tactile Cuing (DTTC), a treatment for Childhood Apraxia of Speech.*

- Had you heard of DTTC prior to the treatment?
- What do you think of the DTTC treatment?
- What do you think were the most important parts of the therapy for your child? (cues, watching the clinician, touch cues, repetition etc)
- What were you surprised about when you saw the treatment being used in the first session?
- Did your thoughts change as the sessions progressed?
- What would you have liked more of in the treatment sessions?
- What would you have liked less of?
- Was your child's reaction to this therapy block similar to or different from previous speech therapy your child has had? Why do you think this might be?

### **Demographics**

- Parent/carer age bracket: Under 24, 25 – 34, 35 – 44, 45 – 54, above 55 -
- Education level for mother: did not complete high school, completed high school, completed post-secondary professional certificate or diploma, completed bachelor's degree, completed post-graduate study (masters, PhD)
- Occupation
- Post code / ZIP code
